# Supplementary material for: Determining the molecular basis for the pH-dependent interaction between 2′-deoxynucleotides and 9H-pyrido[3,4-b]indole in its ground and electronic excited states
Source: Royal Society of Chemistry journal article supplement (doi:10.1039/c4cp01910e), 2014-01-01
Supplement: c4cp01910e1.pdf [file c4cp01910e1.pdf]

## Supporting Information

### **Determining the Molecular Basis for the pH-dependent Interaction among 2'- deoxynucleotides and 9H-pyrido[3,4-b]indole in its ground and electronic excited states**

*M. Micaela Gonzalez<sup>a,b</sup>, M. Paula Denofrio<sup>b</sup>, Fernando S. García-Einschlag<sup>c</sup>, Carlos A. Franca<sup>d</sup>,  
Reinaldo Pis Diez<sup>d</sup>, Rosa Erra-Balsells<sup>a,\*</sup> and Franco M. Cabrerizo<sup>b,\*</sup>*

<sup>a</sup> CIHIDECAR - CONICET, Departamento de Química Orgánica, Facultad de Ciencias Exactas y Naturales, Universidad de Buenos Aires, Pabellón 2, 3p, Ciudad Universitaria, (1428) Buenos Aires, Argentina. E-mail: [erra@qo.fcen.uba.ar](mailto:erra@qo.fcen.uba.ar)

<sup>b</sup> IIB-INTECH (sede Chascomús) - UNSAM-CONICET. Intendente Marino Km 8,2. CC 164, (7130) Chascomús, Buenos Aires, Argentina. E-mail: [fcabrerizo@intech.gov.ar](mailto:fcabrerizo@intech.gov.ar)

<sup>c</sup> INIFTA - CONICET, Facultad de Ciencias Exactas, Universidad Nacional de La Plata, CCT La Plata-CONICET. Casilla de Correo 16, Suc. 4, (1900) La Plata, Buenos Aires, Argentina.

<sup>d</sup> CEQUINOR - CONICET, Facultad de Ciencias Exactas, Universidad Nacional de la Plata, calle 47 y 115, (1900) La Plata, Buenos Aires, Argentina.

\* To whom correspondence should be addressed

**Contents:**

1. UV-vis spectrophotometric titration of dCMP at pH 2.8, 5.5 and 10.5 (Page S3)
2. Results obtained by curve resolution techniques from UV-vis spectra of the nHo-dAMP complexes (Page S4)
3. Table SI.1. Data obtained from chemometric analysis. (Page S5)
4. Normalized UV-visible spectra of the complexes obtained by curve resolution techniques (Page S6)
5. Quenching of norharmane fluorescence by dCMP: steady state analysis. (Page S7)
6. Quenching of norharmane fluorescence by dCMP: time-resolved analysis. (Page S8)
7. Stern-Volmer plots for quenching of norharmane fluorescence by dCMP. (Page S9)
8. Quenching of norharmane fluorescence by dAMP: steady state analysis. (Page S10)
9. Kinetic analysis of the dNMP bleaching photosensitized by norharmane in aqueous solution. (Page S11)
10. Geometric features of the hydrogen bonds found for the stable conformers obtained for the norharmane–dGMP complex. (Page S12)
11. Geometric features of the hydrogen bonds found for the stable conformers obtained for the norharmane–dCMP complex. (Page S15)
12. <sup>1</sup>H-NMR spectra of G5.0 and C2.8 systems. (Page S18)

# 1. UV-vis spectrophotometric titration at pH 2.8, 5.5 and 10.5

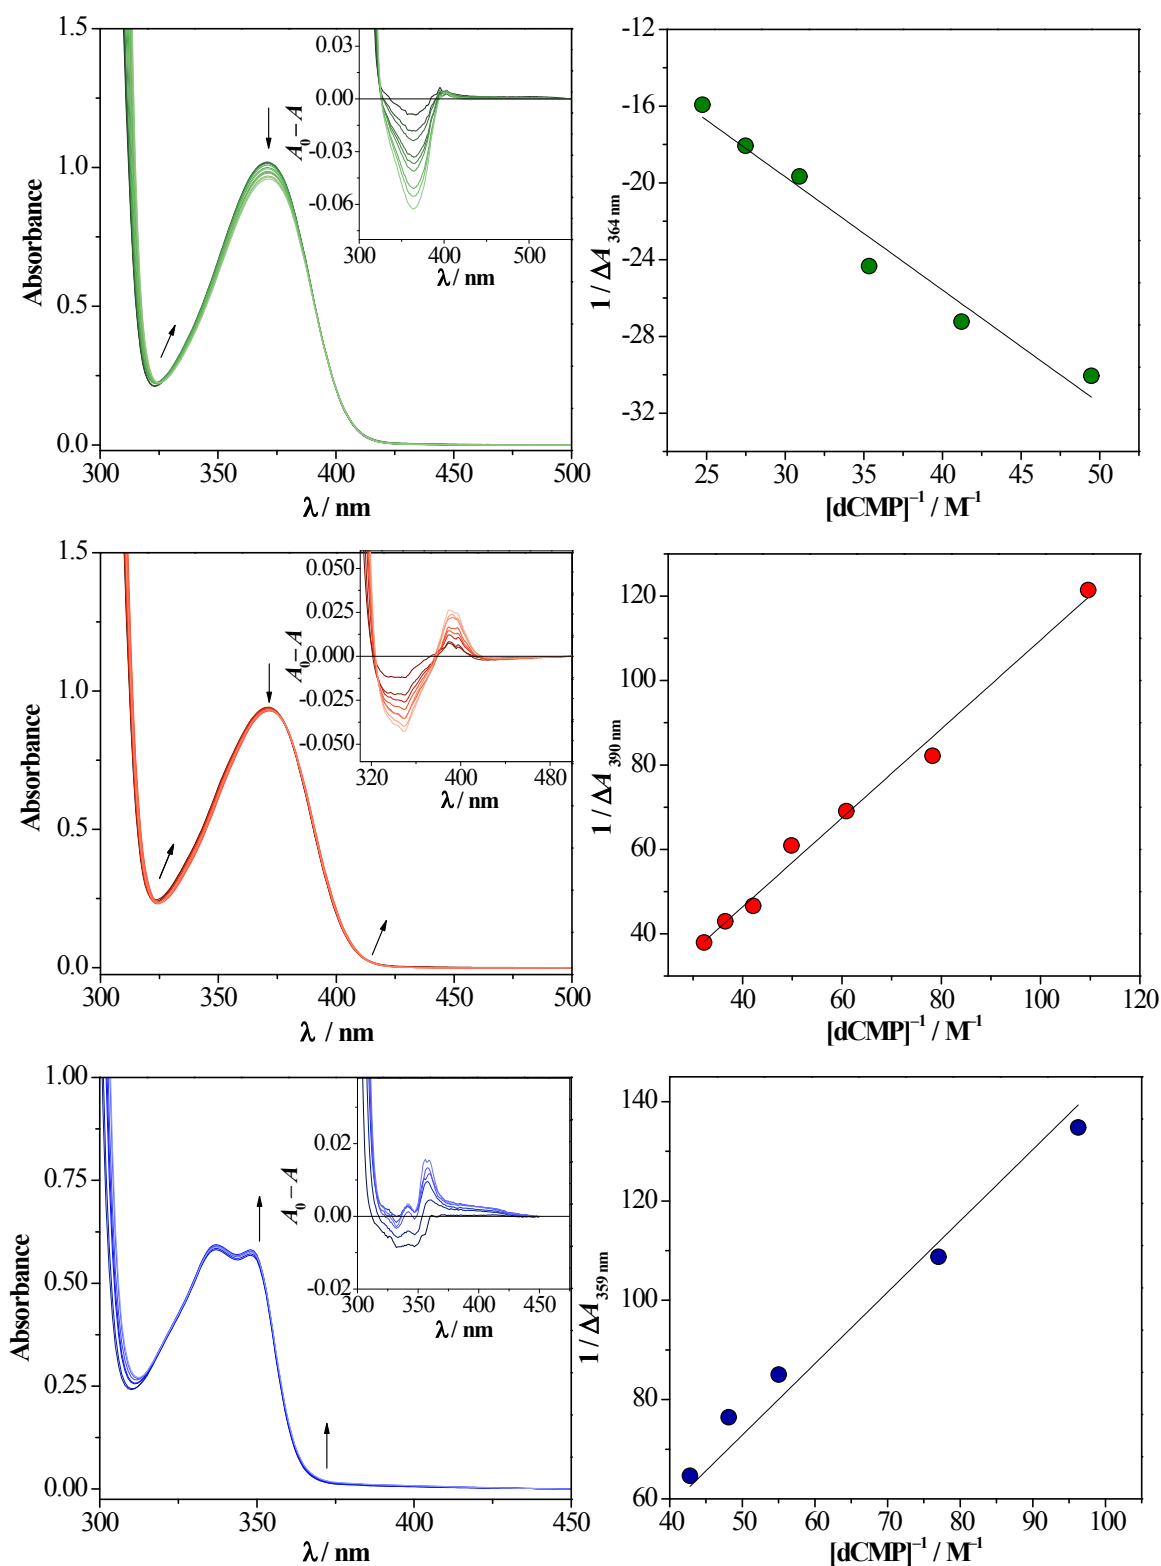

**Figure SI.1.** UV-vis absorption spectra of norharmane in the presence increasing amount of dCMP (see arrows). *Inset:* Experimental Difference spectra (ED). The right side of each figure shows a representative Benesi-Hildebrand plot for each case. (a) pH 2.8,  $[\text{nHoH}^+]_0 = 249 \mu\text{M}$ , (b) pH 5.5,  $[\text{nHoH}^+]_0 = 228 \mu\text{M}$  and (c) pH 10.5,  $[\text{nHoN}]_0 = 154 \mu\text{M}$ .

## 2. Results obtained by curve resolution techniques from UV-vis spectra of the nHo-dAMP complexes

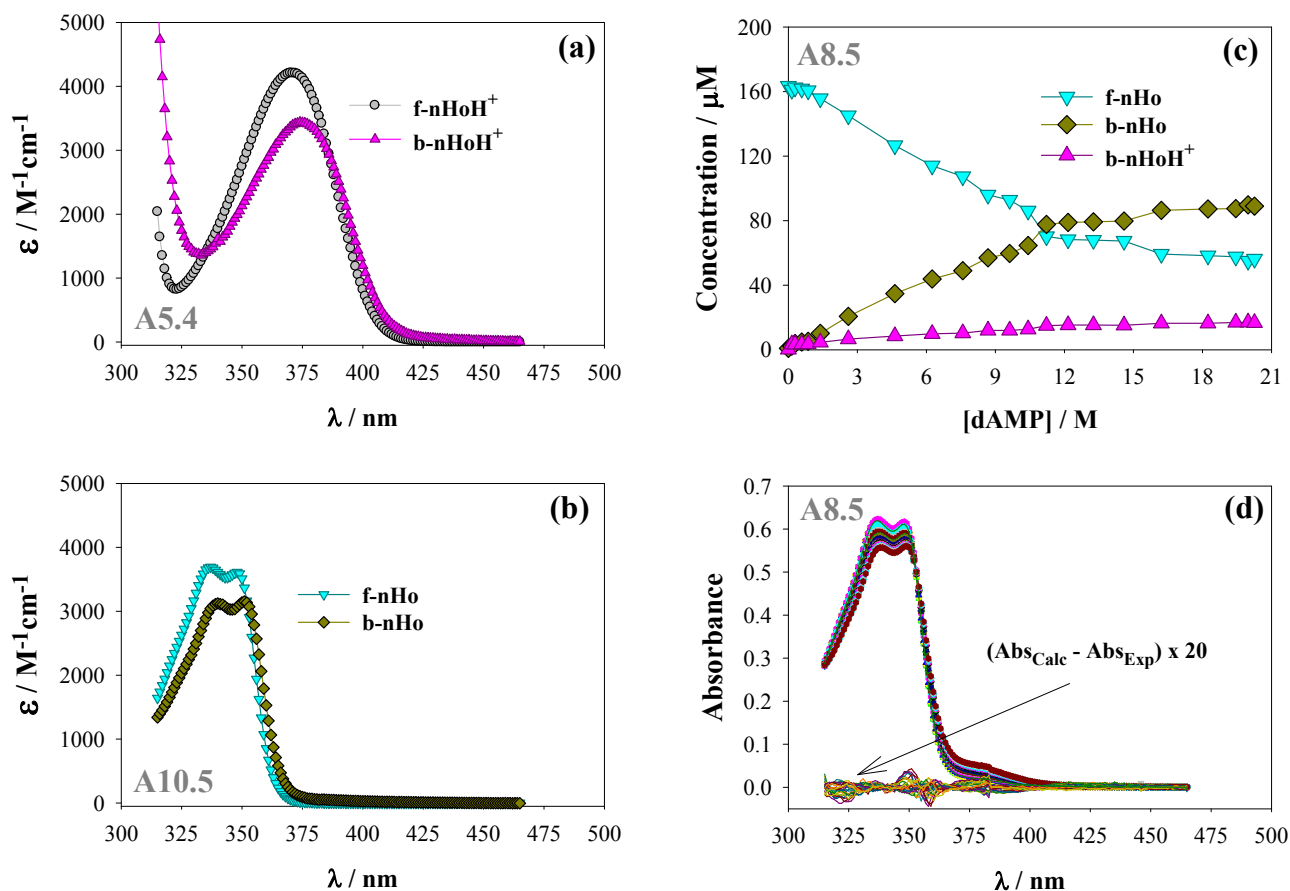

**Figure SI.2.** (a) Absorption spectra of free and bound forms of nHoH<sup>+</sup> at pH 5.0. Inset: Free and bound fractions of nHoH<sup>+</sup> against [dAMP]. (b) Absorption spectra of free and bound forms of nHo at pH 10.5. Inset: free and bound fractions of nHo against [dAMP]. (c) Concentration profiles of free nHo, bound nHo and bound nHoH<sup>+</sup> against [dAMP] resolved from the absorbance matrix recorded at pH 8.5. (d) Comparison between the experimental absorbance matrix A and the error matrix E, calculated as  $A - CS^T$ , at pH 8.5. Free norharmane forms: f-nHo and f-nHoH<sup>+</sup>; Bound norharmane forms: b-nHo and b-nHoH<sup>+</sup>.

3. **Table SI.1.** Data obtained from chemometric analysis.

| System       | $\epsilon / \text{M}^{-1}\text{cm}^{-1}$ | $\lambda / \text{nm}$ | $K_G^{\text{calc}}$ |
|--------------|------------------------------------------|-----------------------|---------------------|
| <b>G5.0</b>  | 3230 (max)                               | 375                   | $84 \pm 4$          |
| <b>G10.5</b> | 3815 (max)                               | 338                   | $31 \pm 2$          |
|              | 3690 (min)                               | 345                   |                     |
|              | 3760 (max)                               | 349                   |                     |
| <b>A5.4</b>  | 3438 (max)                               | 374                   | $75 \pm 11$         |
| <b>A10.5</b> | 3120 (max)                               | 340                   | $35 \pm 2$          |
|              | 3025 (min)                               | 346                   |                     |
|              | 3150 (max)                               | 351                   |                     |

where  $\epsilon$  and  $\lambda$  are the molar absorption coefficient and the wavelength of the maximum of absorption of the complexes, respectively, obtained by the application of the ALS algorithm.  $K_G^{\text{calc}}$  represents the calculated binding constants values calculated for each nucleotide-norharmane complex.

#### 4. Normalized UV-visible spectra of the complexes obtained by curve resolution techniques

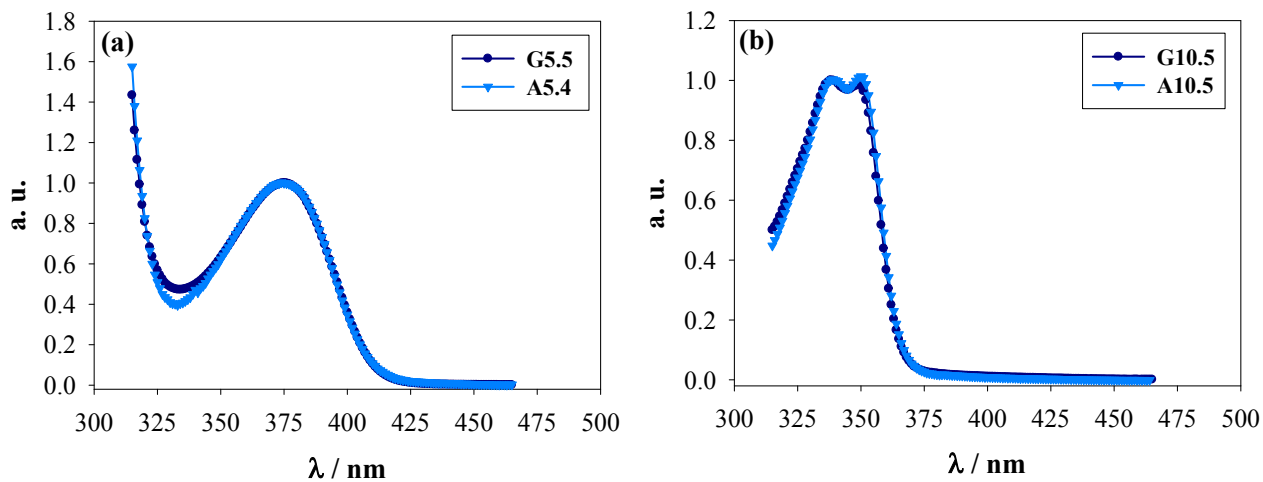

**Figure SI.3.** Comparison between the normalized UV-visible spectra of the complexes formed between purine nucleotides (dGMP and dAMP) and norharmane obtained under acidic (a) and alkaline (b) conditions.

## 5. Quenching of norharmane fluorescence by dCMP: steady state analysis

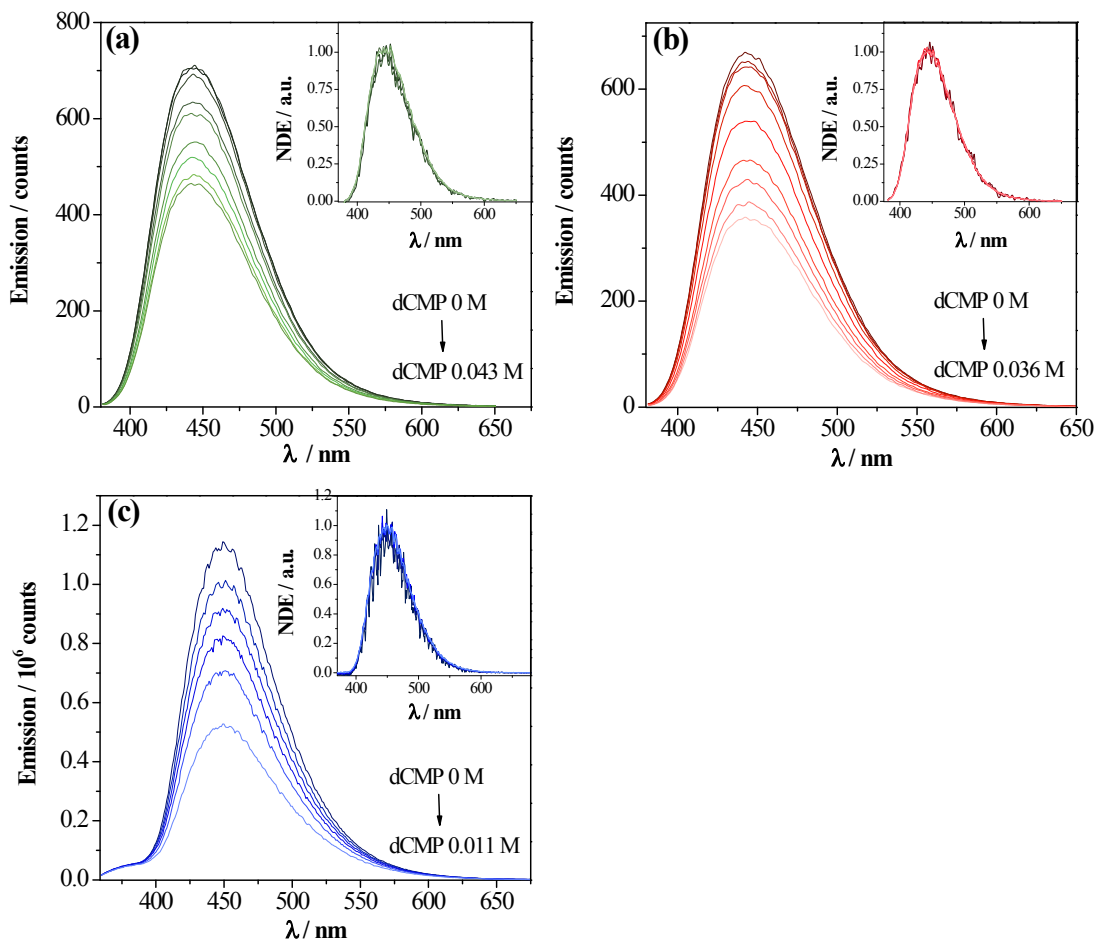

**Figure SI.4.** Corrected fluorescence spectra of norharmane aqueous solution ( $2.0 \times 10^{-5}$  M) as a function of the dCMP concentrations: **(a)** pH 2.8,  $\lambda_{exc} = 370$  nm,  $\lambda_{em} = 373-680$  nm, **(b)** pH 5.5,  $\lambda_{exc} = 370$  nm,  $\lambda_{em} = 373-680$  nm, **(c)** pH 10.5,  $\lambda_{exc} = 349$  nm,  $\lambda_{em} = 360-680$  nm. *Insets:* Normalized Differential Emission Spectra.

## 6. Quenching of norharmane fluorescence by dCMP: time-resolved analysis

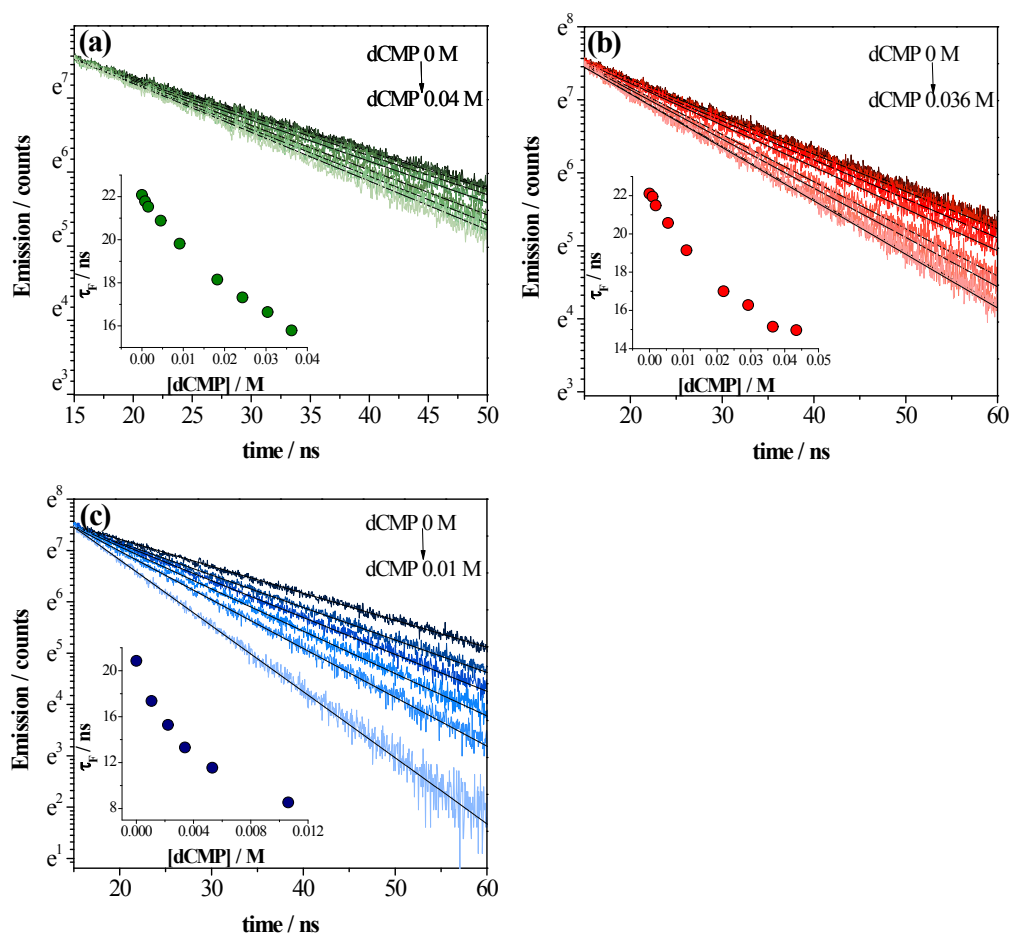

**Figure SI.5.** Fluorescence decays of norharmane aqueous solution ( $2.0 \times 10^{-5}$  M) as a function of the dCMP concentrations at pH (a) 2.8, (b) 5.5 and (c) 10.5.  $\lambda_{\text{exc}} = 341$  nm,  $\lambda_{\text{em}} = 450$  nm. *Inset:* fluorescence lifetime as a function of [dCMP].



## 7. Stern-Volmer plots for quenching of norharmane fluorescence by dCMP

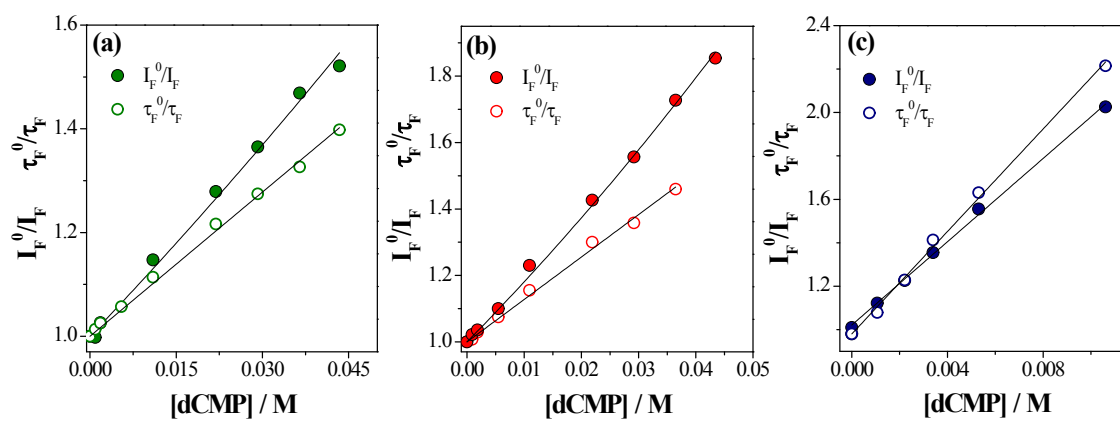

**Figure S1.6.** Quenching of norharmane fluorescence by dCMP at pH: (a) 2.5 (b) 5.5 and (c) 10.5. Stern–Volmer plots of the fluorescence intensities ( $I_F$ ) and the fluorescence lifetimes ( $\tau_F$ );  $\lambda_{exc} = 341$  nm,  $\lambda_{em} = 450$  nm.

## 8. Quenching of norharmane fluorescence by dAMP: steady state analysis.

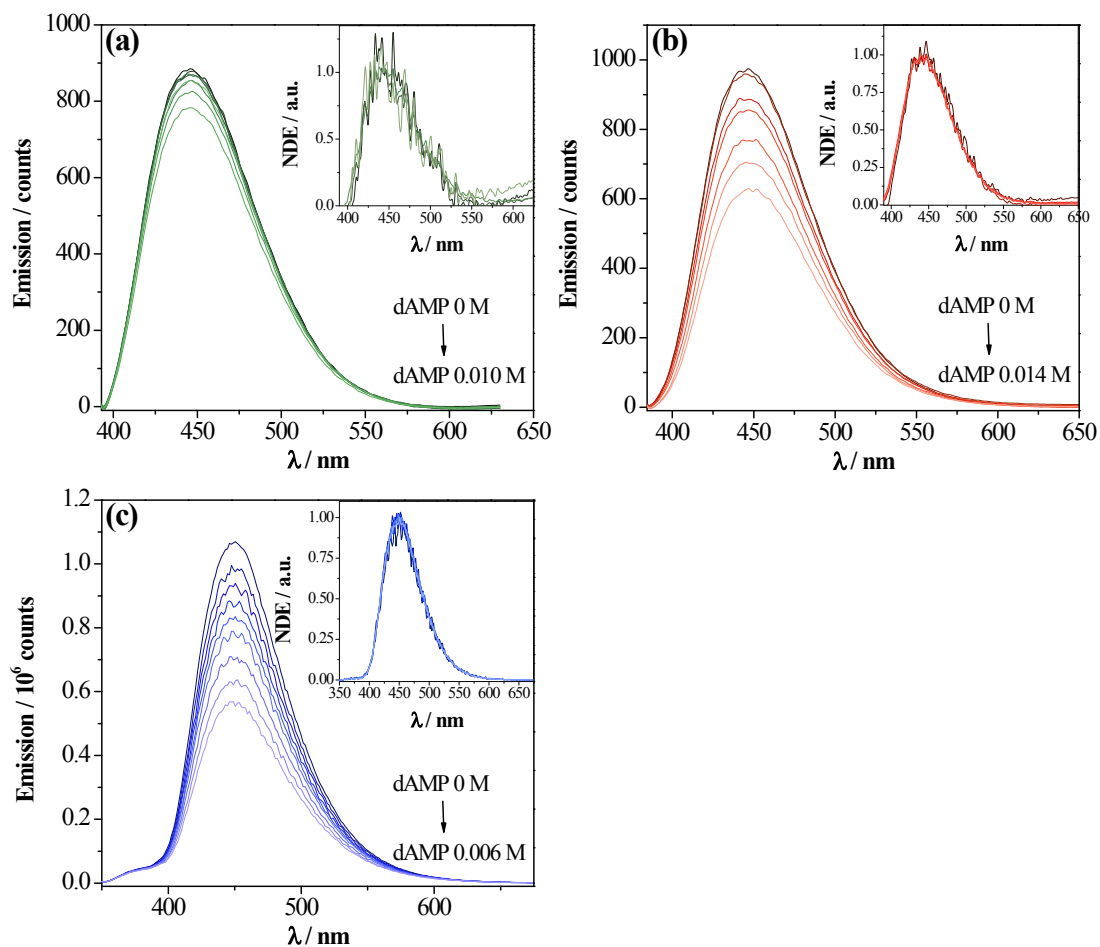

**Figure SI.7.** Corrected fluorescence spectra of norharmane aqueous solution ( $2.0 \times 10^{-5}$  M) as a function of the dAMP concentrations: **(a)** pH 2.8,  $\lambda_{\text{exc}} = 370$  nm,  $\lambda_{\text{em}} = 373\text{-}680$  nm, **(b)** pH 5.5,  $\lambda_{\text{exc}} = 370$  nm,  $\lambda_{\text{em}} = 373\text{-}680$  nm, **(c)** pH 10.5,  $\lambda_{\text{exc}} = 349$  nm,  $\lambda_{\text{em}} = 360\text{-}680$  nm. *Insets:* Normalized Differential Emission Spectra.

## 9. Kinetic analysis of the dNMP bleaching photosensitized by norharmane in aqueous solution.

As a proof of principle, we have investigated the comparative damage on deoxynucleotides (dGMP, dAMP and dCMP) photosensitized by norharmane, under acidic and basic conditions (pH 5.0 and 10.5, respectively). Figure below shows that dCMP is photostable whereas purine deoxynucleotides are photosensitized, being dGMP the most photosensitive target. In addition, the damage is more pronounced in acidic than in alkaline media. These data agree with the nucleotides oxidation potential trend.

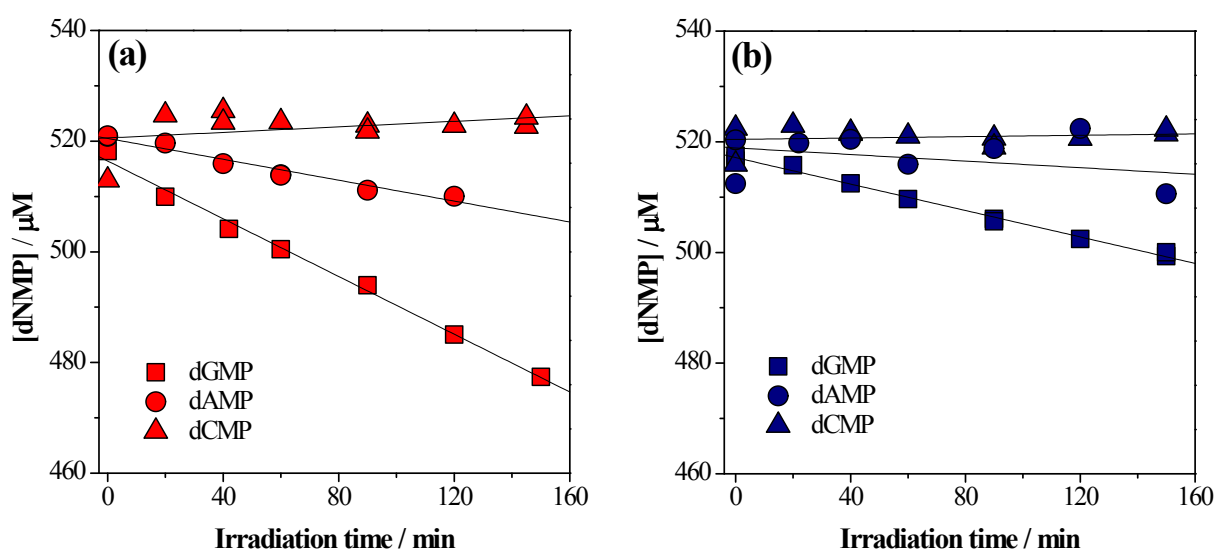

**Figure SI.8.** Evolution of the 2'-deoxynucleotide-5'-monophosphate (dNMP) concentrations in air-equilibrated aqueous solutions at (a) pH 5.0 and (b) 10.5 as a function of elapsed UV irradiation time (concentrations were determined by HPLC analysis):  $\lambda_{\text{exc}} = 350 \text{ nm}$ , photosensitizer used: norharmane.

**10. Geometric features of the hydrogen bonds found for the stable conformers obtained for the norharmane–dGMP complex.**

Table SI.2. The three G5.0, G8.5 and G10.5 systems are considered. Distances are in angstroms and angles in degrees. Only those conformers lying up to 2 kcal mol<sup>-1</sup> above the most stable conformer of each system are shown. Kinetic analysis of the dNMP bleaching photosensitized by norharmane in aqueous solution.

| Conformer | Bond type                    | d(X–H) | d(H···Y) | a(X–H···Y) |
|-----------|------------------------------|--------|----------|------------|
| G5.0-1    | (HPO4) O–H···O (OH)          | 1.025  | 1.756    | 166        |
|           | (NH2)N–H···O (HPO4)          | 1.045  | 1.845    | 169.8      |
| G5.0-2    | (HPO4) O–H···O (OH)          | 1.025  | 1.755    | 166        |
|           | (NH2)N–H···O (HPO4)          | 1.045  | 1.847    | 169.8      |
| G5.0-3    | (HPO4) O–H···O (OH)          | 1.02   | 1.721    | 174.3      |
|           | (NH2)N–H···O (HPO4)          | 1.042  | 1.88     | 163.2      |
| G5.0-4    | (NH2)N–H···O (HPO4)          | 1.05   | 1.795    | 155.6      |
|           | N9–H···O (HPO4)              | 1.041  | 1.716    | 173.3      |
|           | (HPO4) O–H···O (deoxyribose) | 1.024  | 1.722    | 151.1      |
| G5.0-5    | N9–H···O (HPO4)              | 1.054  | 1.681    | 175.6      |
| G5.0-6    | N2–H···O (HPO4)              | 1.094  | 1.608    | 164.5      |
| G8.5-1    | (OH) O–H···O (PO4)           | 1.083  | 1.495    | 172        |
|           | (NH2)N–H···O (PO4)           | 1.047  | 1.823    | 171.4      |
|           | N9–H···O (deoxyribose)       | 1.034  | 1.959    | 169.6      |
| G8.5-2    | (OH) O–H···O (PO4)           | 1.091  | 1.479    | 171.2      |
|           | N9–H···O (deoxyribose)       | 1.031  | 1.881    | 173.4      |
| G8.5-3    | (OH) O–H···O (PO4)           | 1.091  | 1.48     | 170.9      |
|           | N9–H···O (deoxyribose)       | 1.031  | 1.881    | 173.2      |
| G8.5-4    | (OH) O–H···O (PO4)           | 1.09   | 1.481    | 170.8      |
|           | N9–H···O (deoxyribose)       | 1.031  | 1.88     | 172.8      |
| G8.5-5    | (OH) O–H···O (PO4)           | 1.09   | 1.483    | 169.9      |
|           | N9–H···O (deoxyribose)       | 1.031  | 1.89     | 172.8      |

|         |                         |       |       |       |
|---------|-------------------------|-------|-------|-------|
| G8.5-6  | (OH) O—H····O (PO4)     | 1.09  | 1.483 | 170   |
|         | N9—H····O (deoxyribose) | 1.031 | 1.887 | 173   |
| G8.5-7  | (OH) O—H····O (PO4)     | 1.091 | 1.48  | 171   |
|         | N9—H····O (deoxyribose) | 1.031 | 1.879 | 173.1 |
| G8.5-8  | (OH) O—H····O (PO4)     | 1.092 | 1.478 | 171.3 |
|         | N9—H····O (deoxyribose) | 1.031 | 1.882 | 173.5 |
| G8.5-9  | (OH) O—H····O (PO4)     | 1.092 | 1.479 | 171.1 |
|         | N9—H····O (deoxyribose) | 1.031 | 1.878 | 173.1 |
| G8.5-10 | (OH) O—H····O (PO4)     | 1.092 | 1.479 | 171   |
|         | N9—H····O (deoxyribose) | 1.031 | 1.88  | 173.2 |
| G8.5-11 | (OH) O—H····O (PO4)     | 1.091 | 1.482 | 170.1 |
|         | N9—H····O (deoxyribose) | 1.031 | 1.889 | 174   |
| G8.5-12 | (OH) O—H····O (PO4)     | 1.091 | 1.479 | 171   |
|         | N9—H····O (deoxyribose) | 1.031 | 1.881 | 173.3 |
| G8.5-13 | (OH) O—H····O (PO4)     | 1.091 | 1.479 | 170.9 |
|         | N9—H····O (deoxyribose) | 1.031 | 1.881 | 173.2 |
| G8.5-14 | (OH) O—H····O (PO4)     | 1.089 | 1.49  | 168.6 |
|         | N9—H····O (deoxyribose) | 1.03  | 1.87  | 176.3 |
| G8.5-15 | (OH) O—H····O (PO4)     | 1.09  | 1.489 | 168.2 |
|         | N9—H····O (deoxyribose) | 1.03  | 1.87  | 176.2 |
| G8.5-16 | (OH) O—H····O (PO4)     | 1.083 | 1.512 | 161.4 |
|         | N9—H····O (deoxyribose) | 1.031 | 1.873 | 177   |
| G8.5-17 | (OH) O—H····O (PO4)     | 1.078 | 1.515 | 169.4 |
|         | N9—H····O (PO4)         | 1.079 | 1.623 | 164.7 |
|         | (NH2)N—H····O (PO4)     | 1.044 | 1.973 | 159.8 |
| G8.5-18 | (OH) O—H····O (PO4)     | 1.077 | 1.518 | 168.8 |
|         | N9—H····O (PO4)         | 1.079 | 1.62  | 164.9 |

|         |                                               |       |       |       |
|---------|-----------------------------------------------|-------|-------|-------|
|         | (NH <sub>2</sub> )N—H····O (PO <sub>4</sub> ) | 1.045 | 1.958 | 159.5 |
| G10.5-1 | (OH) O—H····O (PO <sub>4</sub> )              | 1.089 | 1.486 | 170.1 |
|         | N9—H····O (deoxyribose)                       | 1.033 | 1.87  | 173.3 |
| G10.5-2 | (OH) O—H····O (PO <sub>4</sub> )              | 1.089 | 1.486 | 170   |
|         | N9—H····O (deoxyribose)                       | 1.033 | 1.87  | 172.7 |

**11. Geometric features of the hydrogen bonds found for the stable conformers obtained for the norharmane–dCMP complex.**

Table SI.3. The three C2.8, C5.5 and C10.5 systems are considered. Distances are in angstroms and angles in degrees. Only those conformers lying up to 2 kcal mol<sup>-1</sup> above the most stable conformer of each system are shown.

| Conformer | Bond type                       | d(X–H) | d(H···Y) | $\alpha$ (X–H···Y) |
|-----------|---------------------------------|--------|----------|--------------------|
| C2.8-1    | N9–H···O (HPO4)                 | 1.041  | 1.903    | 137.3              |
|           | N9–H···O (deoxyribose)          | 1.041  | 1.984    | 137.9              |
| C5.5-1    | N9–H···O (HPO4)                 | 1.056  | 1.681    | 166.9              |
|           | (HPO4) O–H···O (deoxyribose)    | 1.016  | 1.895    | 137.6              |
| C5.5-2    | N9–H···O (HPO4)                 | 1.036  | 1.742    | 170.8              |
|           | (HPO4) O–H···O (deoxyribose)    | 1.024  | 1.68     | 157.8              |
| C5.5-3    | N9–H···O (HPO4)                 | 1.054  | 1.69     | 166.9              |
| C5.5-4    | (HPO4) O–H···O (OH deoxyribose) | 1.027  | 1.729    | 165.8              |
| C5.5-5    | N9–H···O (HPO4)                 | 1.036  | 1.741    | 170.8              |
|           | (HPO4) O–H···O (deoxyribose)    | 1.024  | 1.681    | 157.6              |
| C5.5-6    | 2N–H···O (HPO4)                 | 1.509  | 1.939    | 112.8              |
|           | (HPO4) O–H···O (OH deoxyribose) | 1.026  | 1.769    | 163.7              |
| C5.5-7    | (HPO4) O–H···O (OH deoxyribose) | 1.024  | 1.752    | 164.5              |
| C5.5-8    | (HPO4) O–H···O (OH deoxyribose) | 1.023  | 1.758    | 165                |
| C5.5-9    | (HPO4) O–H···O (OH deoxyribose) | 1.023  | 1.757    | 165.1              |
| C5.5-10   | N2–H···O (HPO4)                 | 1.095  | 1.596    | 167.1              |
| C5.5-11   | N9–H···O (HPO4)                 | 1.037  | 1.74     | 170.7              |
|           | (HPO4) O–H···O (deoxyribose)    | 1.022  | 1.736    | 161.2              |
| C5.5-12   | N9–H···O (HPO4)                 | 1.05   | 1.721    | 159                |
| C5.5-13   | (HPO4) O–H···O (OH deoxyribose) | 1.023  | 1.758    | 164.9              |
| C5.5-14   | (HPO4) O–H···O (OH deoxyribose) | 1.036  | 1.667    | 161.7              |
| C5.5-15   | (HPO4) O–H···O (OH deoxyribose) | 1.023  | 1.759    | 164.9              |
| C5.5-16   | N2–H···O (HPO4)                 | 1.1    | 1.573    | 168.2              |
|           | (HPO4) O–H···O (OH deoxyribose) | 1.025  | 1.766    | 139.1              |

|         |                                  |       |       |       |
|---------|----------------------------------|-------|-------|-------|
| C5.5-17 | (HPO4) O—H····O (OH deoxyribose) | 1.028 | 1.732 | 165.4 |
| C5.5-18 | N9—H····O (HPO4)                 | 1.05  | 1.767 | 153   |
|         | (HPO4) O—H····O (OH deoxyribose) | 1.033 | 1.677 | 162.7 |
| C5.5-19 | (HPO4) O—H····O (OH deoxyribose) | 1.027 | 1.734 | 165.3 |
| C5.5-20 | (HPO4) O—H····O (OH deoxyribose) | 1.037 | 1.646 | 163.5 |
| C5.5-21 | (HPO4) O—H····O (OH deoxyribose) | 1.036 | 1.666 | 161.8 |
| C5.5-22 | N2—H····O (HPO4)                 | 1.094 | 1.603 | 167   |
|         | (HPO4) O—H····O (OH deoxyribose) | 1.025 | 1.731 | 162.9 |
| C5.5-23 | N2—H····O (HPO4)                 | 1.06  | 1.89  | 127.5 |
|         | (HPO4) O—H····O (OH deoxyribose) | 1.026 | 1.775 | 163.3 |
| C5.5-24 | (HPO4) O—H····O (OH deoxyribose) | 1.027 | 1.727 | 157.1 |
| C5.5-25 | (HPO4) O—H····O (OH deoxyribose) | 1.022 | 1.761 | 165   |
| C5.5-26 | N9—H····O (HPO4)                 | 1.057 | 1.671 | 177.7 |
| C5.5-27 | (HPO4) O—H····O (OH deoxyribose) | 1.027 | 1.707 | 168.5 |
| C5.5-28 | N9—H····O (HPO4)                 | 1.058 | 1.678 | 170.6 |
| C5.5-29 | (HPO4) O—H····O (OH deoxyribose) | 1.027 | 1.707 | 168.4 |
| C5.5-30 | (HPO4) O—H····O (OH deoxyribose) | 1.027 | 1.732 | 165.5 |
| C5.5-31 | N2—H····O (HPO4)                 | 1.096 | 1.588 | 159.4 |
|         | (HPO4) O—H····O (OH deoxyribose) | 1.036 | 1.685 | 166.6 |
| C5.5-32 | N2—H····O (HPO4)                 | 1.075 | 1.75  | 143.8 |
|         | (OH deoxyribose) O—H····O (HPO4) | 1.031 | 1.717 | 161   |
| C5.5-33 | N2—H····O (HPO4)                 | 1.096 | 1.587 | 159.7 |
|         | (OH deoxyribose) O—H····O (HPO4) | 1.036 | 1.685 | 166.7 |
| C5.5-34 | (HPO4) O—H····O (OH deoxyribose) | 1.026 | 1.729 | 157.6 |
| C5.5-35 | (HPO4) O—H····O (OH deoxyribose) | 1.028 | 1.734 | 165.3 |



|          |                                  |       |       |       |
|----------|----------------------------------|-------|-------|-------|
| C5.5-36  | N2—H····O (HPO4)                 | 1.062 | 1.852 | 130   |
|          | (HPO4) O—H····O (OH deoxyribose) | 1.028 | 1.757 | 164.7 |
| C5.5-37  | (OH deoxyribose) O—H····O (HPO4) | 1.012 | 1.823 | 157.2 |
| C5.5-38  | (OH deoxyribose) O—H····O (HPO4) | 1.012 | 1.824 | 157.2 |
| C5.5-39  | N9—H····O (HPO4)                 | 1.058 | 1.659 | 174.8 |
| C5.5-40  | (OH deoxyribose) O—H····O (HPO4) | 1.035 | 1.675 | 161.5 |
| C5.5-41  | N2—H····O (HPO4)                 | 1.096 | 1.587 | 169.6 |
| C10.5-1  | (deoxyribose) O—H····O (PO4)     | 1.088 | 1.483 | 171.3 |
|          | N9—H····O (deoxyribose)          | 1.031 | 1.935 | 163.5 |
| C10.5-2  | (deoxyribose) O—H····O (PO4)     | 1.088 | 1.488 | 169.9 |
|          | N9—H····O (deoxyribose)          | 1.032 | 1.94  | 166.9 |
| C10.5-3  | (deoxyribose) O—H····O (PO4)     | 1.088 | 1.502 | 167.8 |
|          | N9—H····O (deoxyribose)          | 1.074 | 1.6   | 174.8 |
| C10.5-4  | (deoxyribose) O—H····O (PO4)     | 1.09  | 1.491 | 168.7 |
|          | N9—H····O (PO4)                  | 1.072 | 1.613 | 172.6 |
| C10.5-5  | (deoxyribose) O—H····O (PO4)     | 1.089 | 1.496 | 168.1 |
|          | N9—H····O (PO4)                  | 1.073 | 1.601 | 173.8 |
| C10.5-6  | (deoxyribose) O—H····O (PO4)     | 1.084 | 1.512 | 168.3 |
|          | N9—H····O (PO4)                  | 1.073 | 1.601 | 169.9 |
| C10.5-7  | (deoxyribose) O—H····O (PO4)     | 1.09  | 1.484 | 170.6 |
| C10.5-8  | (deoxyribose) O—H····O (PO4)     | 1.083 | 1.496 | 171.1 |
|          | N9—H····O (deoxyribose)          | 1.035 | 1.872 | 162.4 |
| C10.5-9  | (deoxyribose) O—H····O (PO4)     | 1.089 | 1.485 | 170.3 |
| C10.5-10 | (deoxyribose) O—H····O (PO4)     | 1.096 | 1.463 | 170.1 |
|          | N9—H····O (PO4)                  | 1.04  | 1.834 | 142   |
| C10.5-11 | (deoxyribose) O—H····O (PO4)     | 1.089 | 1.477 | 172.9 |
| C10.5-12 | (deoxyribose) O—H····O (PO4)     | 1.091 | 1.483 | 170   |
| C10.5-13 | (deoxyribose) O—H····O (PO4)     | 1.09  | 1.483 | 170.5 |
| C10.5-14 | (deoxyribose) O—H····O (PO4)     | 1.089 | 1.476 | 172.9 |
| C10.5-15 | (deoxyribose) O—H····O (PO4)     | 1.09  | 1.485 | 170.3 |
| C10.5-16 | (deoxyribose) O—H····O (PO4)     | 1.083 | 1.496 | 171.1 |
|          | N9—H····O (PO4)                  | 1.035 | 1.873 | 162.4 |
| C10.5-17 | (deoxyribose) O—H····O (PO4)     | 1.089 | 1.476 | 173.1 |
| C10.5-18 | (deoxyribose) O—H····O (PO4)     | 1.091 | 1.48  | 170.5 |

|          |                             |       |       |       |
|----------|-----------------------------|-------|-------|-------|
| C10.5-19 | (deoxyribose) O-H...O (PO4) | 1.091 | 1.483 | 170.4 |
| C10.5-20 | (deoxyribose) O-H...O (PO4) | 1.089 | 1.476 | 173.1 |
| C10.5-21 | (deoxyribose) O-H...O (PO4) | 1.089 | 1.479 | 172.4 |
| C10.5-22 | (deoxyribose) O-H...O (PO4) | 1.083 | 1.497 | 170.6 |
|          | N9-H...O (deoxyribose)      | 1.035 | 1.869 | 163.1 |
| C10.5-23 | (deoxyribose) O-H...O (PO4) | 1.055 | 1.604 | 148.5 |
|          | N9-H...O (PO4)              | 1.072 | 1.616 | 172.2 |

## 12. $^1\text{H}$ -NMR spectra of G5.0 and C2.8 systems.

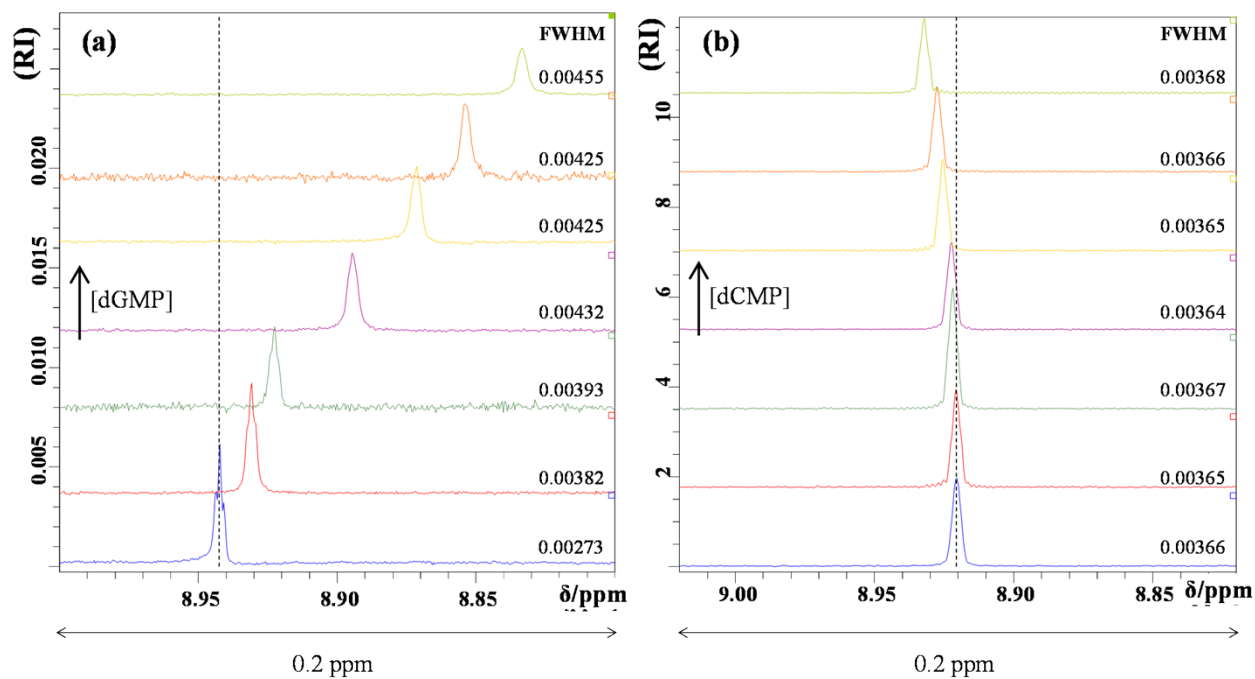

**Figure SI.9.** Representative example of the chemical shift of the norharmane C1-H signal as a function of dNMPs concentration in  $\text{D}_2\text{O}$  solution: (a) system G5.0 and (b) system C2.8. To show the changes, several  $^1\text{H}$ -NMR spectra are displayed in the same figure. In each case, the dashed line was added as a reference;  $\delta$  in ppm; FWHM: full width at half maximum in ppm.
